# Supplementary material
Source: Research Square preprint supplement (doi:10.21203/rs.3.rs-9299039/v1)
Supplement: Supplementary file 1 [file 0391f0cd9987f30b06cb3ade.docx]

**Table 1: PLM-Defined Mutation-Intolerant Hotspots**

| **Position** | **Residue** | **Avg ΔLL** | **Neighbor Count** | **Distance to Heme (Å)** |
| --- | --- | --- | --- | --- |
| 35 | TYR | −11.46 | 11 | 15.83 |
| 42 | PHE | −10.38 | 11 | 10.73 |
| 36 | PRO | −8.65 | 11 | 16.19 |
| 63 | HIS | −8.63 | 16 | 8.22 |
| 11 | VAL | −8.30 | 17 | 21.68 |
| 60 | VAL | −8.27 | 23 | 11.78 |
| 45 | PHE | −7.89 | 12 | 13.96 |
| 32 | LEU | −7.63 | 21 | 13.28 |
| 98 | VAL | −7.62 | 16 | 8.05 |
| 64 | GLY | −7.61 | 19 | 8.92 |
| 103 | PHE | −7.42 | 17 | 8.32 |
| 106 | LEU | −7.40 | 18 | 10.10 |
| 28 | LEU | −7.33 | 22 | 10.08 |
| 38 | THR | −7.08 | 15 | 11.70 |
| 7 | GLU | −6.84 | 17 | 25.61 |

# **Table 2: Layer-wise Spearman Correlation Between RSA and Average Mutation Sensitivity (ESM-1b)**

| **Layer** | **ρ** | **p-value** |
| --- | --- | --- |
| 1 | -0.571 | 6.30×10⁻14 |
| 2 | -0.577 | 2.99×10⁻14 |
| 3 | -0.589 | 6.33×10⁻15 |
| 4 | -0.586 | 9.87×10⁻15 |
| 5 | -0.586 | 9.79×10⁻15 |
| 6 | -0.575 | 3.72×10⁻14 |
| 7 | -0.561 | 2.15×10⁻13 |
| 8 | -0.562 | 1.91×10⁻13 |
| 9 | -0.579 | 2.23×10⁻14 |
| 10 | -0.588 | 7.74×10⁻15 |
| 11 | -0.582 | 1.65×10⁻14 |
| 12 | -0.568 | 9.81×10⁻14 |
| 13 | -0.567 | 1.01×10⁻13 |
| 14 | -0.550 | 8.11×10⁻13 |
| 15 | -0.533 | 5.20×10⁻12 |
| 16 | -0.546 | 1.20×10⁻12 |
| 17 | -0.537 | 3.21×10⁻12 |
| 18 | -0.518 | 2.40×10⁻11 |
| 19 | -0.516 | 3.12×10⁻11 |
| 20 | -0.508 | 7.02×10⁻11 |
| 21 | -0.500 | 1.59×10⁻10 |
| 22 | -0.499 | 1.61×10⁻10 |
| 23 | -0.480 | 9.68×10⁻10 |
| 24 | -0.463 | 4.45×10⁻9 |
| 25 | -0.464 | 4.08×10⁻9 |
| 26 | -0.435 | 4.45×10⁻8 |
| 27 | -0.382 | 2.15×10⁻6 |
| 28 | -0.392 | 1.09×10⁻6 |
| 29 | -0.306 | 1.79×10⁻4 |
| 30 | -0.282 | 5.80×10⁻4 |
| 31 | -0.115 | 0.168 |
| 32 | -0.006 | 0.947 |
| 33 | 0.358 | 4.48×10⁻6 |

**Table 3: Variance Decomposition with Interaction Model**

| **Predictor** | **Standardized β** | **Unique Adj. R²** | **p-value** |
| --- | --- | --- | --- |
| RSA | 0.226 | 0.0507 | < 0.001 |
| BLOSUM62 | 0.491 | 0.2403 | < 0.001 |
| RSA × BLOSUM | −0.076 | 0.0056 | < 0.001 |

Full model adjusted R² = 0.3063
No multicollinearity observed (all VIF ≈ 1).

**Table 4: Cross-Model Comparison of Mutation Sensitivity and Structural Encoding Metrics (ESM-1b vs ESM-2)**

| **Metric** | **ESM-1b** | **ESM-2** |
| --- | --- | --- |
| ΔLL cross-model ρ | 0.78 | |
| Core vs Surface p | 4.48e-6 | 7.66e-07 |
| RSA ρ | 0.35 | 0.478 |
| BLOSUM ρ | 0.50 | 0.5264 |
| Adjusted R² | 0.301 | 0.3126 |
| RSA unique variance | 5.1% | 6.86% |

### **Table 5: Cross-Protein Structural Encoding Metrics**

| **Protein** | **Length** | **Core vs Surface p** | **RSA ρ** | **Evolutionary Entropy ρ** | **BLOSUM ρ** |
| --- | --- | --- | --- | --- | --- |
| HBB | 146 | 4.48 × 10⁻⁶ | 0.35 | 0.17 | 0.50 |
| p53 DBD | 194 | 2.02 × 10⁻⁶ | 0.40 | 0.12 | 0.38 |
| Lysozyme | 130 | 4.17 × 10⁻¹¹ | 0.60 | 0.19 | 0.42 |
| DHFR | 186 | 6.83 × 10⁻¹⁵ | 0.59 | 0.47 | 0.44 |
| Ubiquitin | 76 | 1.57 × 10⁻² | 0.31 | 0.20 | 0.50 |
| TEM-1 β-lactamase | 263 | 2.72 × 10⁻¹⁵ | 0.54 | 0.54 | 0.38 |
| T4 Lysozyme | 164 | 4.31 × 10⁻⁴ | 0.33 | 0.57 | 0.36 |
| RNase A | 124 | 1.55 × 10⁻² | 0.23 | 0.25 | 0.28 |
| Adenylate Kinase | 214 | 1.32 × 10⁻⁴ | 0.32 | 0.27 | 0.44 |
| Thioredoxin | 108 | 7.68 × 10⁻⁴ | 0.36 | 0.10 | 0.56 |
| Barnase | 108 | 8.56 × 10⁻⁸ | 0.51 | 0.15 | 0.39 |
| PDZ Domain | 115 | 1.62 × 10⁻³ | 0.37 | 0.37 | 0.32 |
| Beta-Glucosidase | 447 | 3.58 × 10⁻²⁰ | 0.48 | 0.52 | 0.37 |
| Barstar | 108 | 9.02 × 10⁻⁹ | 0.50 | 0.15 | 0.39 |
| Carbonic Anhydrase | 256 | 2.83 × 10⁻¹⁷ | 0.64 | 0.22 | 0.40 |
| Calmodulin | 144 | 3.62 × 10⁻⁴ | 0.28 | 0.08 | 0.54 |
| WW Domain | 37 | 1.11 × 10⁻¹ | 0.22 | 0.40 | 0.38 |
| Homeodomain | 54 | 1.55 × 10⁻³ | 0.51 | 0.39 | 0.35 |
| Estrogen Receptor LBD | 235 | 5.39 × 10⁻¹⁰ | 0.44 | 0.27 | 0.40 |
| FKBP12 | 107 | 9.70 × 10⁻⁴ | 0.42 | 0.22 | 0.51 |
| Fibronectin III | 368 | 5.73 × 10⁻¹⁵ | 0.50 | 0.49 | 0.43 |
| Chymotrypsin | 131 | 1.31 × 10⁻⁷ | 0.54 | 0.18 | 0.42 |
| Influenza HA1 | 328 | 3.33 × 10⁻² | 0.37 | 0.36 | 0.11 |
| Cytochrome C | 104 | 6.02 × 10⁻³ | 0.43 | 0.20 | 0.46 |
| Protein L | 67 | 1.62 × 10⁻¹ | 0.49 | 0.24 | 0.24 |
| LexA | 197 | 2.76 × 10⁻¹² | 0.60 | 0.63 | 0.45 |
| Klenow Fragment | 595 | 1.21 × 10⁻²⁶ | 0.51 | 0.45 | 0.36 |
| Myoglobin | 153 | 1.49 × 10⁻⁵ | 0.39 | 0.49 | 0.40 |
| Cold Shock Protein | 69 | 1.56 × 10⁻² | 0.37 | 0.20 | 0.49 |
| Catalase | 499 | 8.47 × 10⁻²⁴ | 0.50 | 0.32 | 0.36 |
| Subtilisin | 275 | 1.62 × 10⁻²⁰ | 0.64 | 0.41 | 0.43 |
| SH3 Domain | 56 | 1.50 × 10⁻² | 0.49 | 0.42 | 0.46 |
| TIM | 255 | 7.86 × 10⁻⁸ | 0.37 | 0.55 | 0.39 |
| Thymidylate Synthase | 263 | 9.30 × 10⁻¹¹ | 0.42 | 0.23 | 0.44 |
| Protein G | 56 | 6.06 × 10⁻¹ | 0.41 | 0.41 | 0.32 |
| Enolase | 436 | 2.37 × 10⁻²⁰ | 0.45 | 0.20 | 0.42 |
| PGK | 415 | 5.70 × 10⁻¹³ | 0.37 | 0.34 | 0.45 |
| Malate Dehydrogenase | 333 | 5.58 × 10⁻¹¹ | 0.38 | 0.19 | 0.42 |
| SARS-CoV-2 RBD | 597 | 1.52 × 10⁻³³ | 0.56 | 0.49 | 0.40 |
| Protein 4W6Z | 347 | 5.30 × 10⁻¹⁷ | 0.49 | 0.44 | 0.44 |
