# Supplementary material
Source: Research Square preprint supplement (doi:10.21203/rs.3.rs-9299039/v1)
Supplement: Supplementary file 2 [file 45b831e8407f20422c5b3fdf.docx]

**
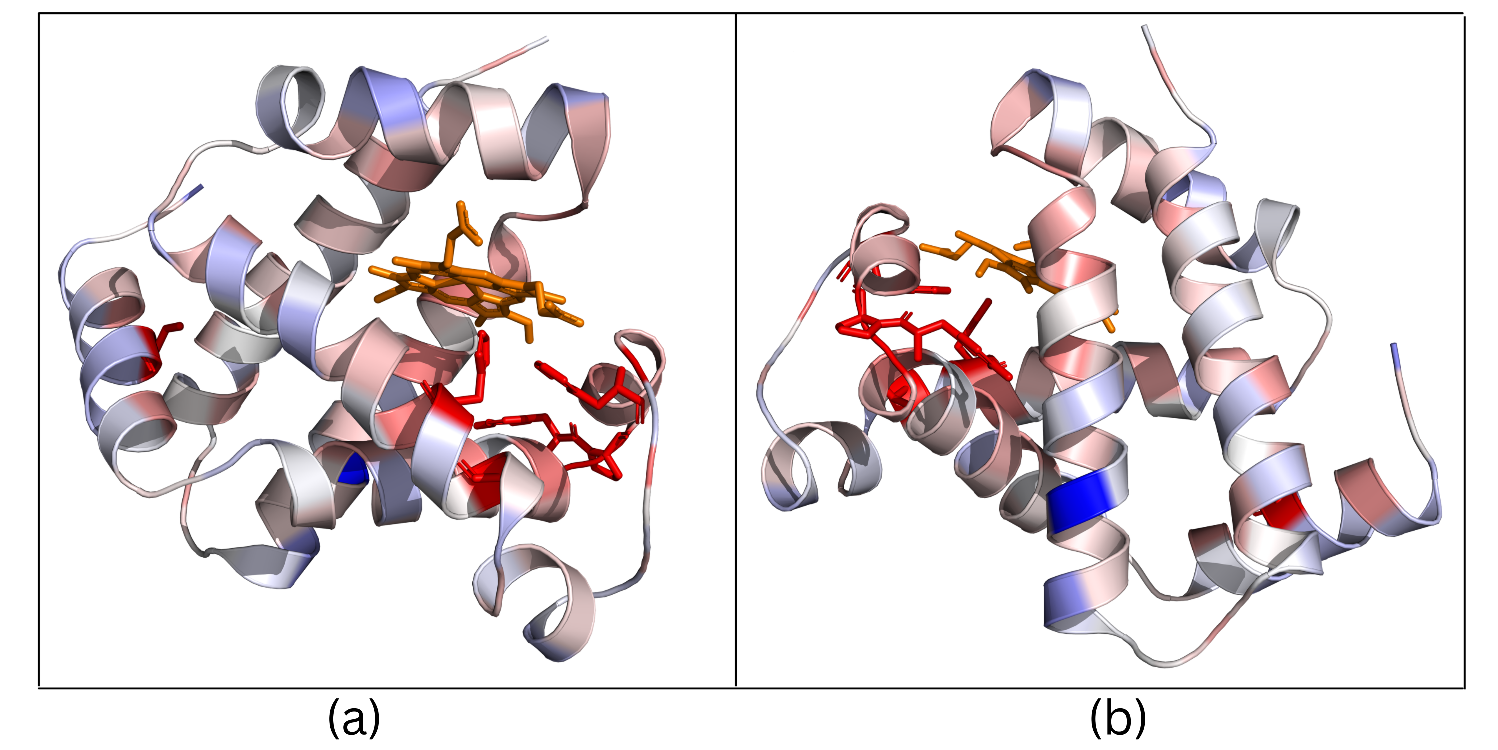
**

### Supplementary Figure 1: **Structural Mapping of Mutation-Intolerant Residues in HBB**. (a) front-face orientation (b) back-face orientation. Heatmap summarizing structural characteristics of the 15 most mutation-intolerant residues in HBB. Features include relative buriedness, distance to the heme group, and normalized mutation intolerance. Hotspots predominantly exhibit increased burial and, in several cases, proximity to the heme-binding pocket, consistent with structural and functional constraint.


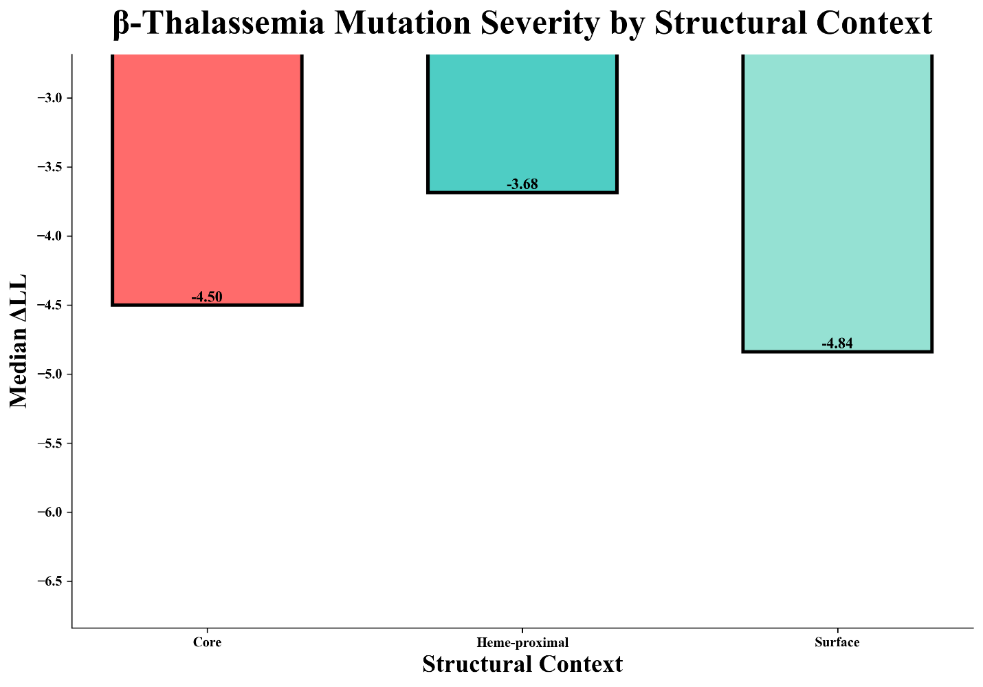


### Supplementary Figure 2****:** β-Thalassemia Mutation Severity by Structural Context.** Median Δlog-likelihood values of β-thalassemia mutations stratified by structural classification: core (n = 14), heme-proximal (n = 3), and surface (n = 3). While differences between groups are modest and not statistically significant due to small sample sizes, the majority of β-thalassemia mutations localize to structurally constrained core or heme-proximal regions.


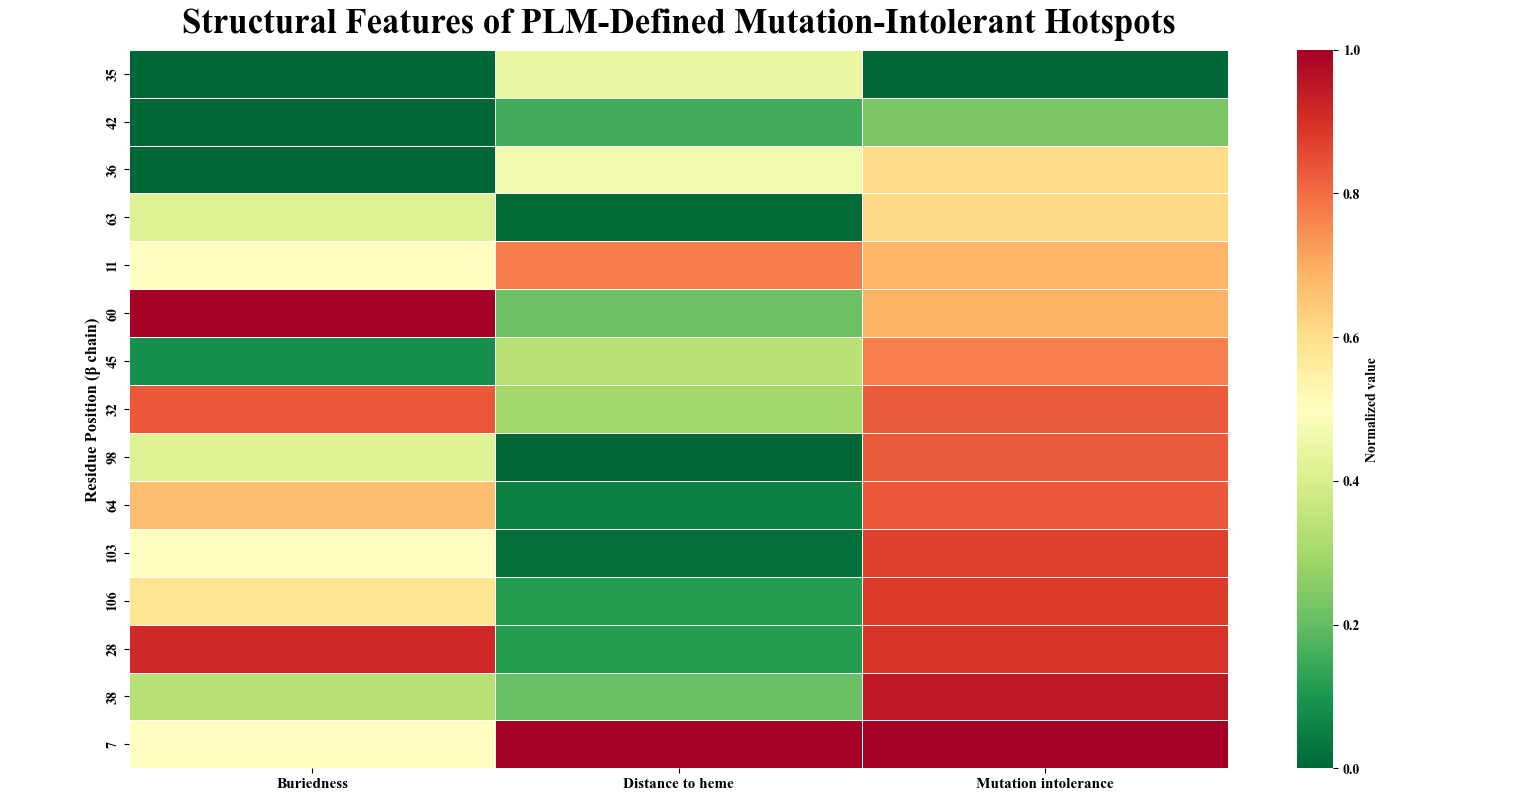


### Supplementary Figure 3****:** Structural Features of PLM-Defined Mutation-Intolerant Hotspots.** Heatmap summarizing structural characteristics of the 15 most mutation-intolerant residues in HBB. Features include relative buriedness, distance to the heme group, and normalized mutation intolerance. Hotspots predominantly exhibit increased burial and, in several cases, proximity to the heme-binding pocket, consistent with structural and functional constraint.
