# Supplementary material
Source: Research Square preprint supplement (doi:10.21203/rs.3.rs-9299039/v1)
Supplement: Supplementary file 3 [file e16d254a172b5b9068bb5545.docx]

## Supplementary Information

## Supplementary Information 1 (SI 1): FASTA Seq of 2774 synthetic and disease mutations

Supplementary Information 2 (SI 2):All PLM results (ESM 1b), along with the Python script used for PLM result curation

Supplementary Information 3 (SI 3):Python script for identification of mutation intolerant hotspot, along with the list of 146 amino acid hotspots and the CSV file containing the top ~10% hotspots (15).

## Supplementary Information 4 (SI 4): The Python script for Solvent Accessibility and Core vs Surface Classification together with the corresponding input files and the SASA and RSA CSV files.

Supplementary Information 5 (SI 5): The Python script used for the topology analysis and structural classification along with the corresponding files.

## Supplementary Information 6 (SI 6): The whole datasets, python scripts for evolutionary entropy, Blosum62 and residual entropy

## Supplementary Information 7 (SI 7): The python script of Multivariable Regression and Variance Decomposition

## Supplementary Information 8 (SI 8): The python script for Additional Proteins for Cross-Protein Validation.

## Supplementary Information 9 (SI 9): Python script of fig 1-3

## Supplementary Information 10 (SI 10): The Python script used for (ESM -2) PLM result curation and dataset

Supplementary Information 11 (SI 11): The python script of layer wise analysis

Supplementary Information 12 (SI 12): The python script of statistical analysis of EVE and PLM model

Supplementary Tables: All the supplementary tables.

Supplementary Figure: All the supplementary Figures.
